# Supplementary material for: An Li+-enriched Co2+-induced metallogel: a study on thixotropic rheological behaviour and conductance
Source: Royal Society of Chemistry journal article supplement (doi:10.1039/c9sm02544h), 2020-01-01
Supplement: c9sm02544h1.pdf [file c9sm02544h1.pdf]

## Supporting Information

# **Li<sup>+</sup>-enriched Co<sup>2+</sup>-induced metallogel: a study on thixotropic rheological behaviour and conductance**

Chinthakuntla Mahendar,<sup>‡</sup> Yeeshu Kumar,<sup>‡</sup> Manish Kumar Dixit and Mrigendra Dubey\*

*\*Soft Materials Research Laboratory,*

*Discipline of Metallurgy Engineering and Materials Science, Indian Institute of Technology  
Indore, Khandwa Road, Simrol, Indore 453552, India.*

*Email: [mdubey@iiti.ac.in](mailto:mdubey@iiti.ac.in), [mrigendradubey@gmail.com](mailto:mrigendradubey@gmail.com)*

*<sup>‡</sup> These authors contributed equally for present work.*

| <b><u>Table of Contents:</u></b> | <b><u>Pages</u></b> |
|----------------------------------|---------------------|
| Scheme S1                        | S1                  |
| Table S1                         | S2                  |
| Table S2                         | S2                  |
| <b>Supplementary Figures</b>     |                     |
| Figure S1                        | S2                  |
| Figure S2                        | S2                  |
| Figure S3                        | S3                  |
| Figure S4                        | S4                  |
| Figure S5                        | S5                  |
| Figure S6                        | S5                  |
| Figure S7                        | S6                  |
| Figure S8                        | S6                  |

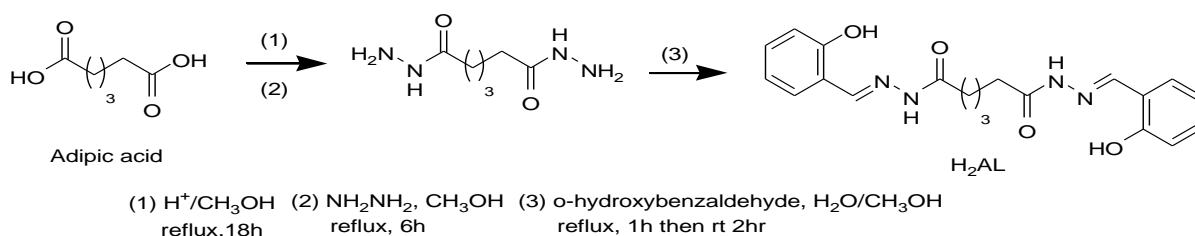

**Scheme S1.** Synthetic scheme adapted for preparation of **H<sub>2</sub>AL**.<sup>1</sup>

**Table S1:** Gelation tests with respect to  $\text{H}_2\text{AL}/\text{LiOH}/\text{Co}(\text{OAc})_2$  and solvents\*

| S.N. | Solvent       | $\text{H}_2\text{AL}/\text{LiOH}/\text{Co}(\text{OAc})_2$ |
|------|---------------|-----------------------------------------------------------|
| 1.   | Water         | S                                                         |
| 2.   | Aceto nitrile | P                                                         |
| 3.   | Methanol      | S                                                         |
| 4.   | Ethanol       | S                                                         |
| 5.   | DMF           | G                                                         |
| 6.   | DMSO          | S                                                         |
| 7.   | Acetone       | P                                                         |
| 8.   | Chloroform    | P                                                         |
| 9.   | DCM           | P                                                         |
| 10.  | THF           | P                                                         |

\*Where, S= solution, G= gel, P= precipitate,

**Table S2:** Gel or sol formation of  $\text{H}_2\text{AL}$  with different alkali bases in presence of  $\text{Co}(\text{OAc})_2$ \*

| Solvent | $\text{H}_2\text{AL}/\text{Li}^+/\text{Co}(\text{OAc})_2$ | $\text{H}_2\text{AL}/\text{Na}^+/\text{Co}(\text{OAc})_2$ | $\text{H}_2\text{AL}/\text{K}^+/\text{Co}(\text{OAc})_2$ | $\text{H}_2\text{AL}/\text{Cs}^+/\text{Co}(\text{OAc})_2$ |
|---------|-----------------------------------------------------------|-----------------------------------------------------------|----------------------------------------------------------|-----------------------------------------------------------|
| DMF     | G                                                         | S                                                         | S                                                        | S                                                         |

\*Where, S= solution, G= gel.

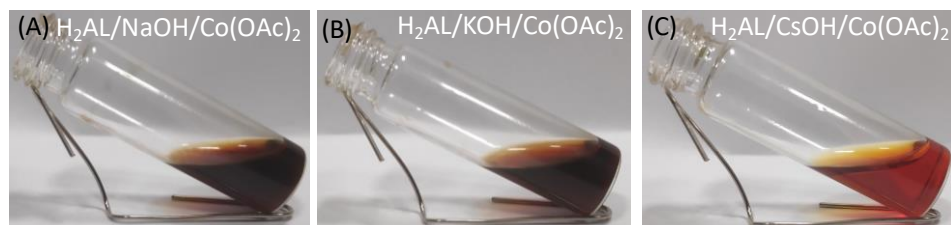

**Figure S1.** The gelation test of gelator **1** with (A)  $\text{Na}^+$ , (B)  $\text{K}^+$ , (C)  $\text{Cs}^+$ .

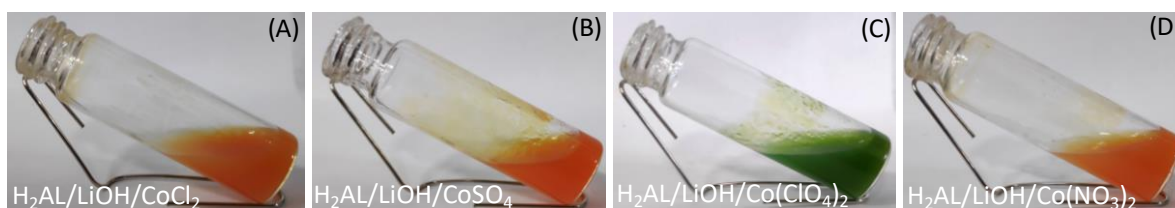

**Figure S2.** The gelation test of  $\text{H}_2\text{AL}/\text{LiOH}$  performed with (A)  $\text{CoCl}_2$ , (B)  $\text{CoSO}_4$ , (C)  $\text{Co}(\text{ClO}_4)_2$  and (D)  $\text{Co}(\text{NO}_3)_2$  leading to only solutions.

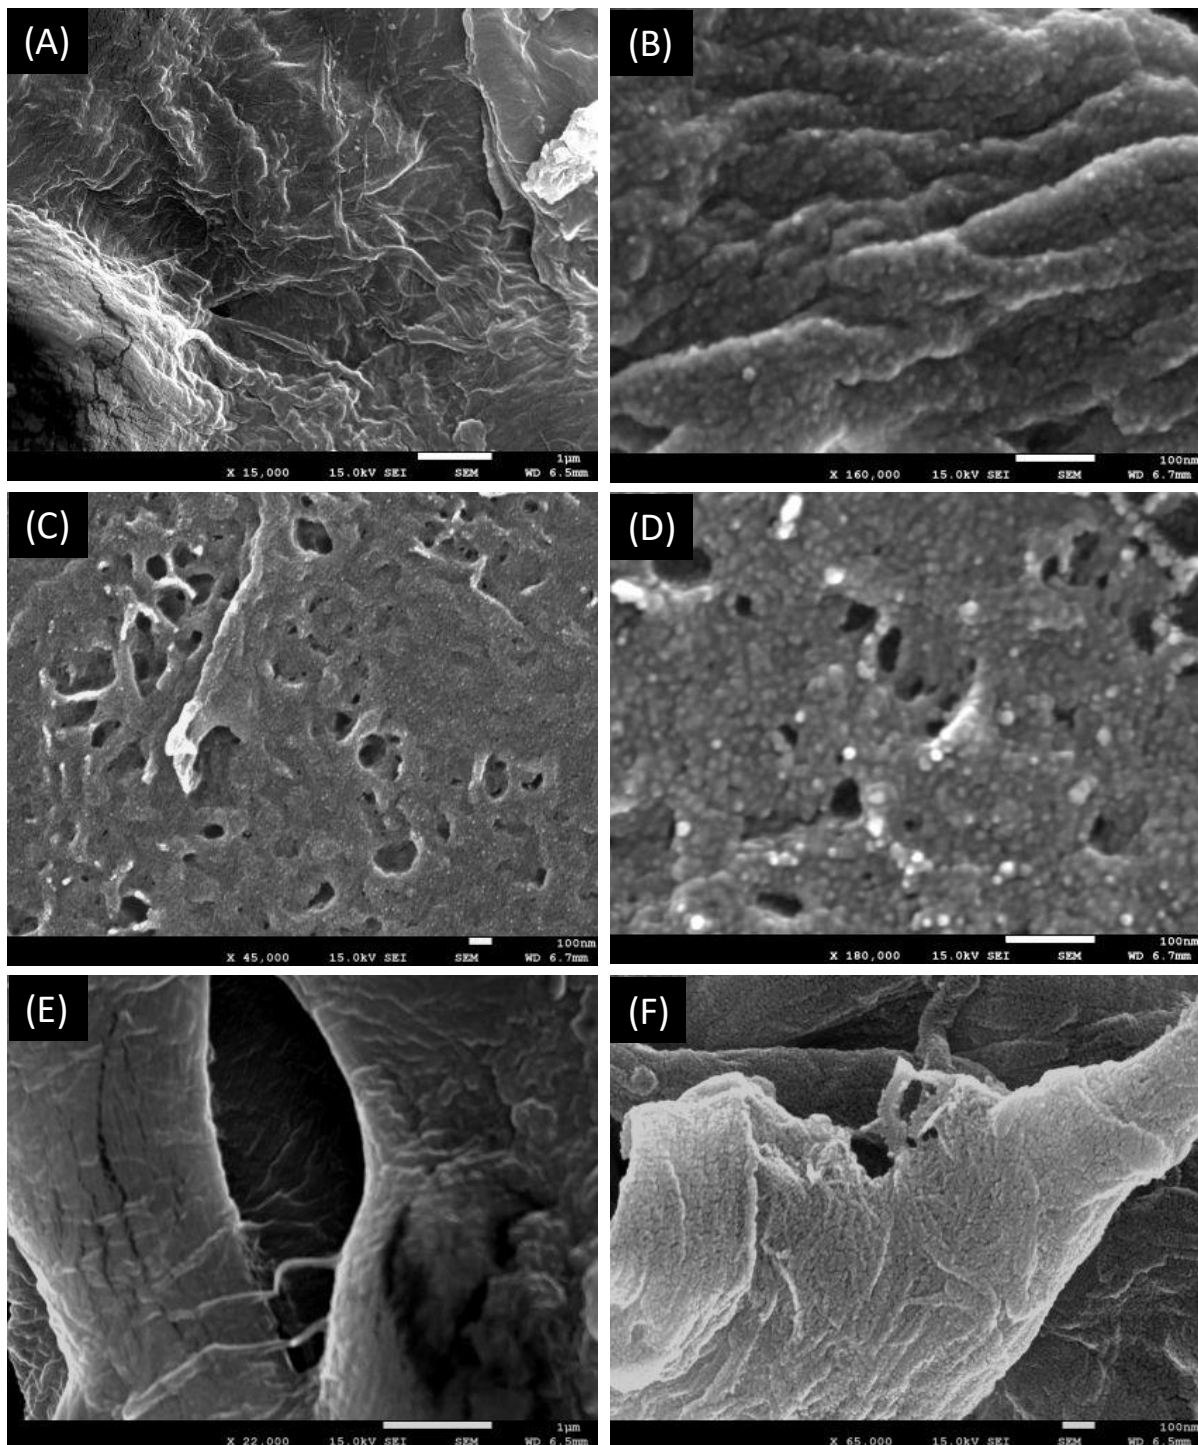

**Figure S3.** (A-F) FE-SEM images of diluted metallogel ( $\text{H}_2\text{AL}/\text{LiOH}/\text{Co}(\text{OAc})_2$ ).

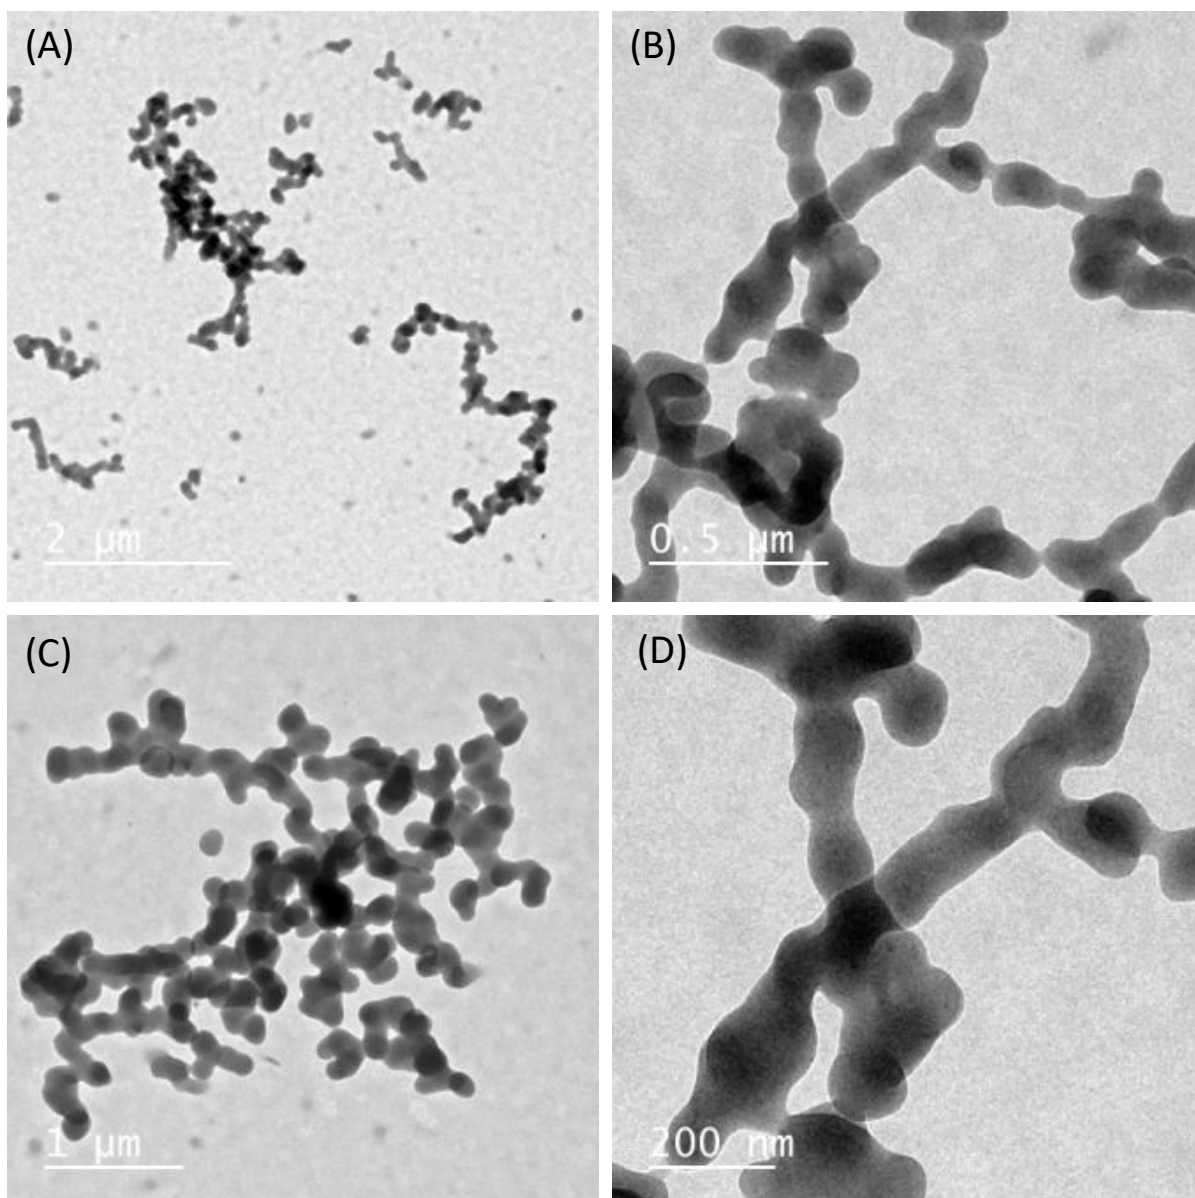

**Figure S4.** (A-D) TEM images of diluted metallogel.

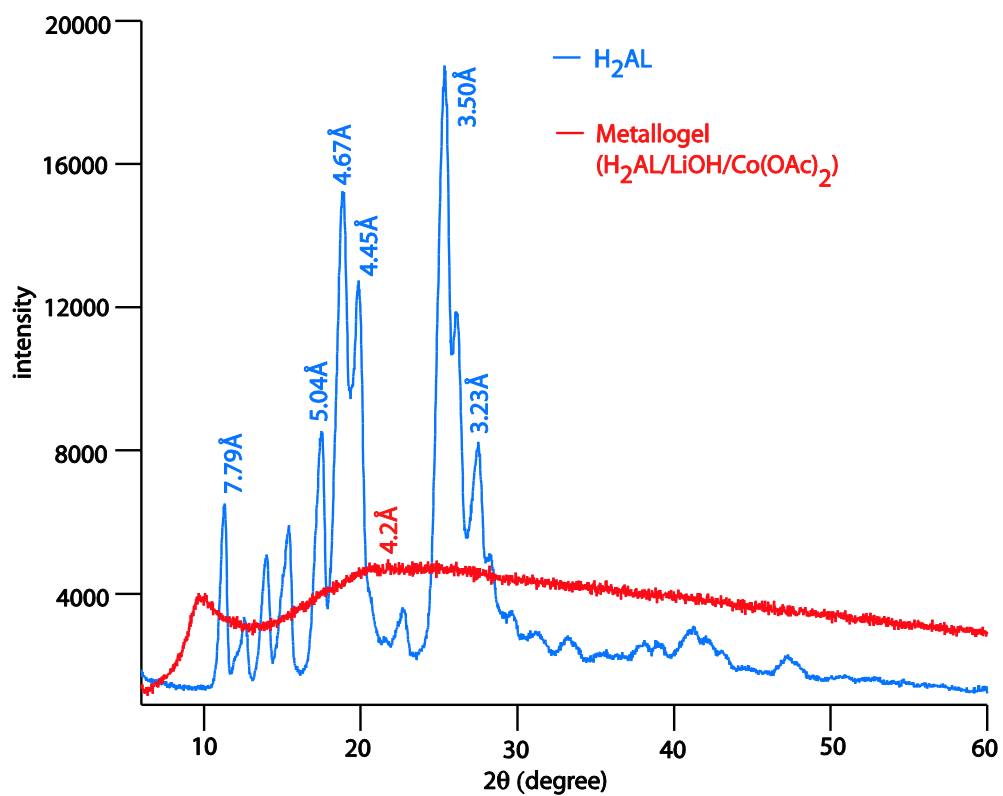

**Figure S5.** A comparative PXRD analysis of pro-ligand **H<sub>2</sub>AL** (blue line) and xerogel (**H<sub>2</sub>AL/LiOH/Co(OAc)<sub>2</sub>**, red line).

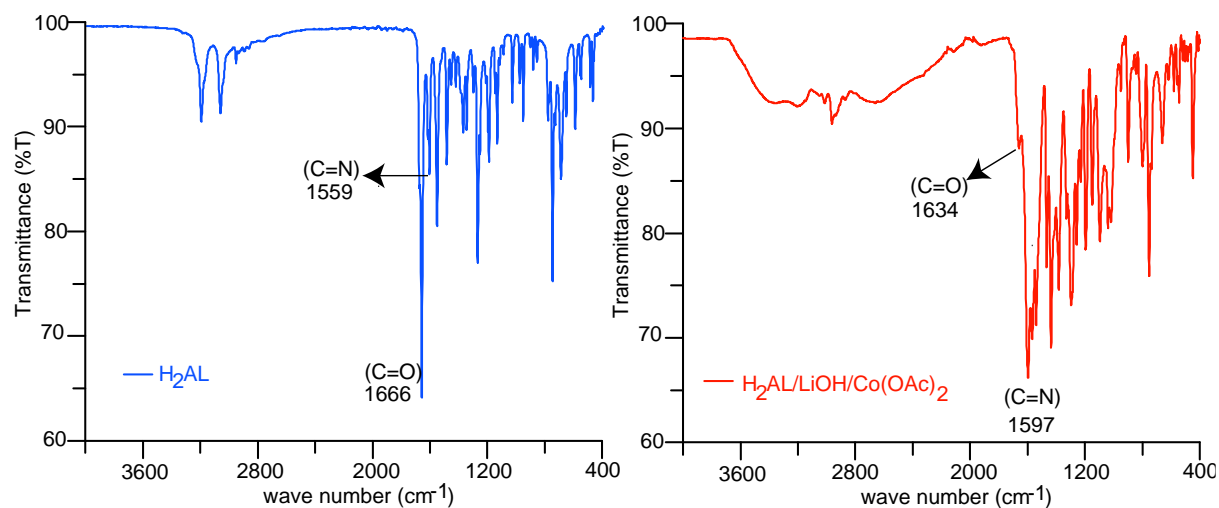

**Figure S6.** A comparison FT IR spectra of (left) pro-ligand **H<sub>2</sub>AL** and (right) xerogel (**H<sub>2</sub>AL/LiOH/Co(OAc)<sub>2</sub>**).

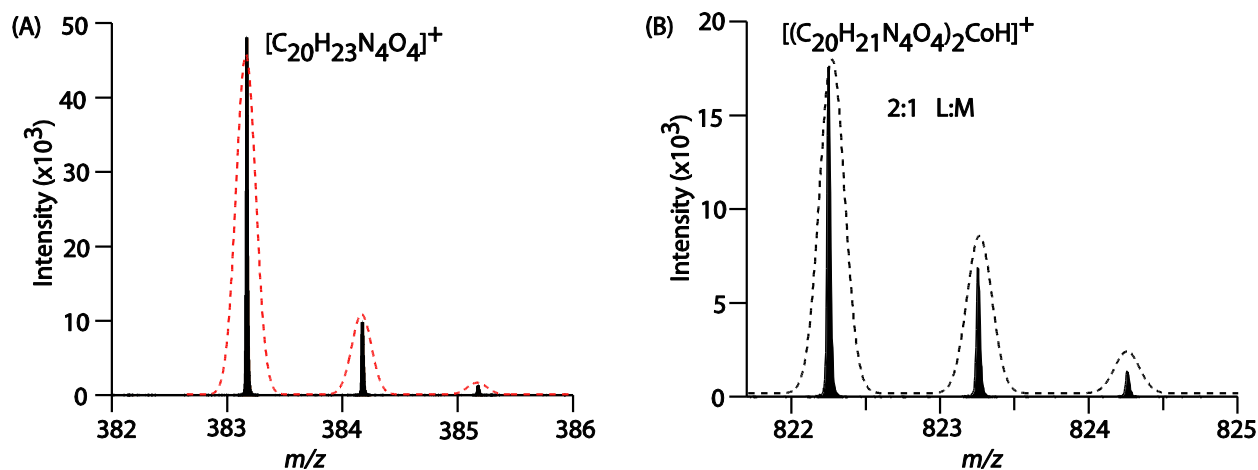

**Figure S7.** Simulated (red dotted line) and experimental (black solid line) isotopic abundance pattern for (A)  $\text{H}_2\text{AL}$  and (B)  $[(\text{C}_{20}\text{H}_{21}\text{N}_4\text{O}_4)_2\text{CoH}]^+$  i.e. 2:1 L:M.

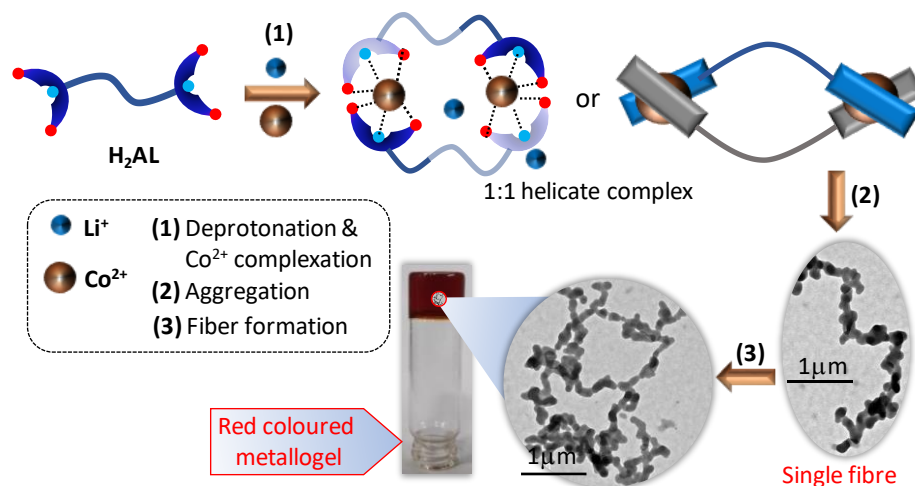

**Figure S8.** Pictorial presentation of plausible mechanism behind gelation.

References:

- (a) M. Dubey, A. Kumar and D. S. Pandey, *Chem. Commun.*, 2014, **50**, 1675; (b) M. K. Dixit, V. K. Pandey and M. Dubey, *Soft Matter*, 2016, **12**, 3622; (c) V. K. Pandey, M. K. Dixit, S. Manneville, C. Bucher and M. Dubey, *J. Mater. Chem. A*, 2017, **5**, 621; (d) M. K. Dixit, C. Mahendar and M. Dubey, *Chem. Asian J.* 10.1002/asia.201900559; (e) M. K. Dixit, Y. Kumar, J. Shukla, C. Mahendar and M. Dubey, *ChemPlusChem* 10.1002/cplu.201900589; (f) M. K. Dixit and M. Dubey, *Phys. Chem. Chem. Phys.*, 2018, **20**, 23762.
